# Supplementary material
Source: publisher figshare collection journal article supplement (https://acs.figshare.com/ndownloader/files/25821240)

Supplementary Information for:

## Structures and Properties of $\text{CoB}_{19}^{+/0/-}$ Clusters

Qi Liang Lu,<sup>\*,†</sup> Qi Quan Luo<sup>‡</sup>

<sup>†</sup> School of Physics and Material Science, Anhui University, Hefei 230601, China

<sup>‡</sup>Hefei National Laboratory for Physical Sciences at the Microscale, University of Science and Technology of China, Hefei 230026, Anhui, P. R. China

\* E-mail qllufd@vip.sina.com

**Figure S1.** Low-lying isomers and relative energies of  $\text{CoB}_{19}^{+}$  clusters. For the first ten isomers, the first line is the relative energies at the level of CCSD(T)/Co/Stuttgart/B/cc-pVTZ level.

**Figure S2.** Low-lying isomers and relative energies of  $\text{CoB}_{19}$  clusters. For the first ten isomers, the first line is the relative energies at the level of CCSD(T)/Co/Stuttgart/B/cc-pVTZ level.

**Figure S3.** Low-lying isomers and relative energies of  $\text{CoB}_{19}^{-}$  clusters. For the first ten isomers, the first line is the relative energies at the level of CCSD(T)/Co/Stuttgart/B/cc-pVTZ level.

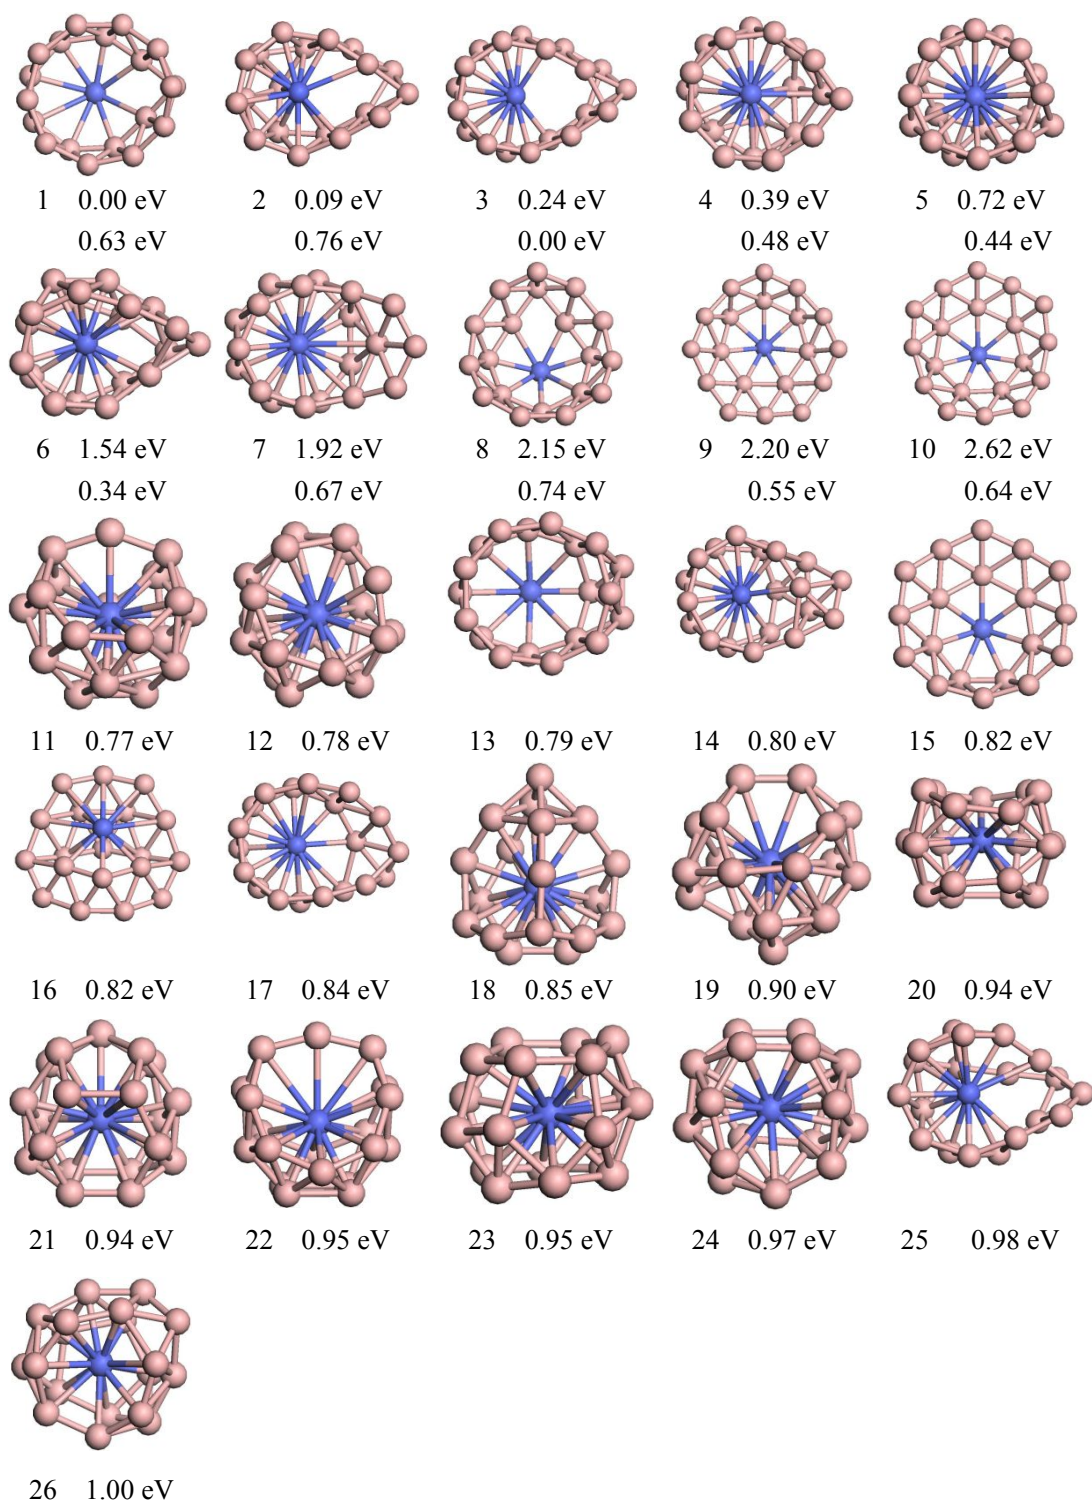

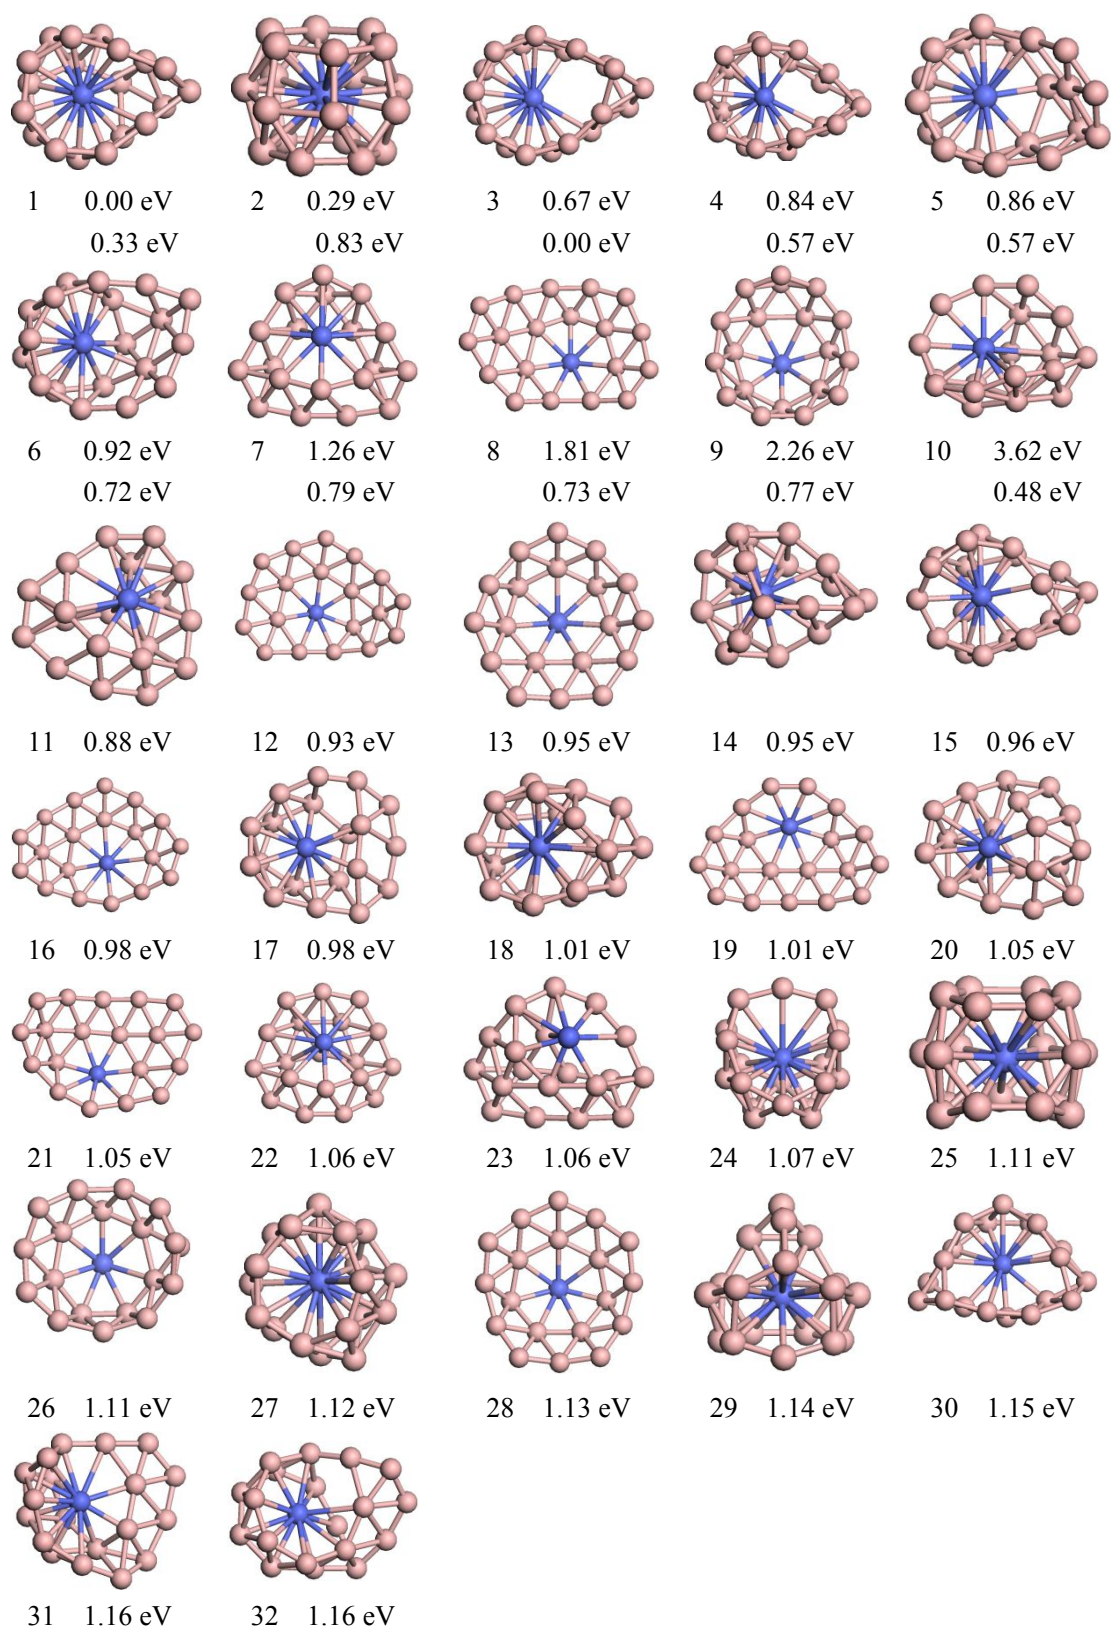



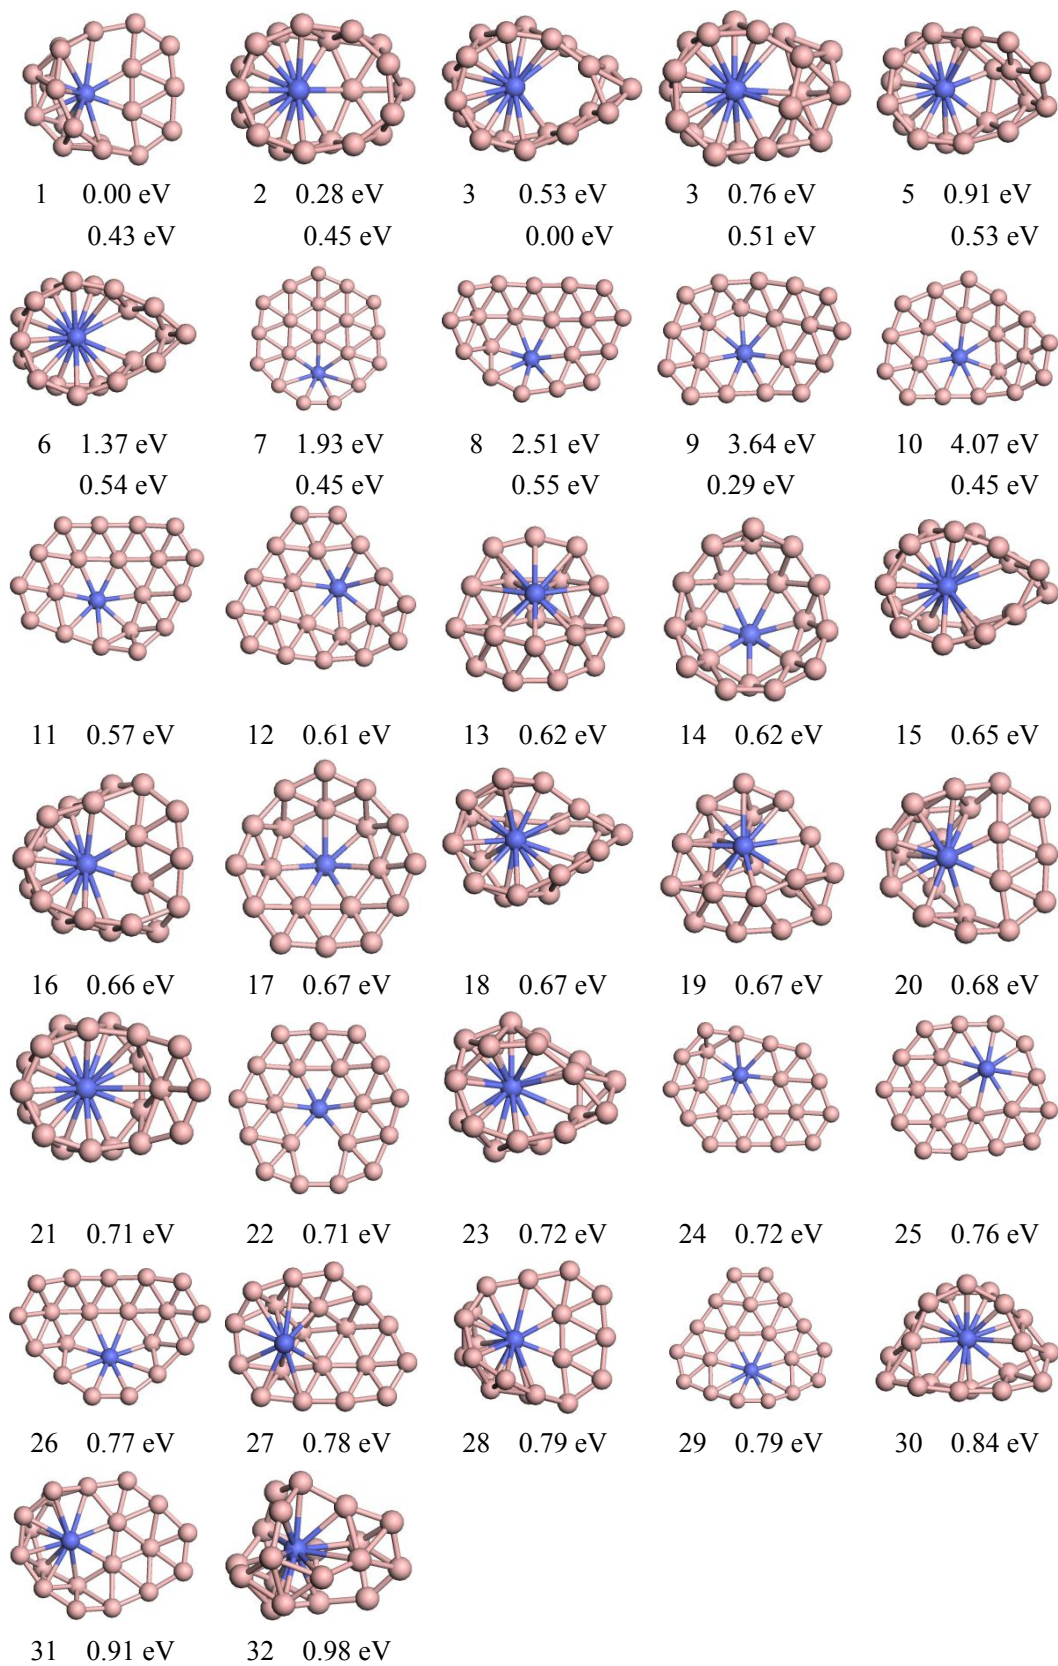

Supplement: Supplementary file 1 [file 25821240]
